# Supplementary material for: A QSAR–ICE–SSD Model Prediction of the PNECs for Per- and Polyfluoroalkyl Substances and Their Ecological Risks in an Area of Electroplating Factories
Source: MDPI journal article supplement (doi:10.3390/molecules26216574), 2021-10-30
Supplement: s1 [file s1]

---

## Support Information

# A QSAR–ICE–SSD Model Prediction of the PNECs for Per- and Polyfluoroalkyl Substances and Their Ecological Risks in an Area of Electroplating Factories

Jiawei Zhang <sup>1,2</sup>, Mengtao Zhang <sup>1</sup>, Huanyu Tao <sup>1,2</sup>, Guanjing Qi <sup>1</sup>, Wei Guo <sup>1,3</sup>, Hui Ge <sup>1,\*</sup> and Jianghong Shi <sup>1,\*</sup>

<sup>1</sup> State Environmental Protection Key Laboratory of Integrated Surface Water-Groundwater Pollution Control, School of Environmental Science and Engineering, Southern University of Science and Technology, Shenzhen 518055, China; 11750007@mail.sustech.edu.cn (J.Z.); 11652003@mail.sustech.edu.cn (M.Z.); 11850006@mail.sustech.edu.cn (H.T.); 11849066@mail.sustech.edu.cn (G.Q.); guow@sustech.edu.cn (W.G.)

<sup>2</sup> Environmental Engineering Research Centre, Department of Civil Engineering, The University of Hong Kong, Hong Kong, China

<sup>3</sup> Key Laboratory of Beijing for Water Quality Science and Water Environment Recovery Engineering, Beijing University of Technology, Beijing 100124, China

\* Correspondence: geh@sustech.edu.cn (H.G.); shijh@sustech.edu.cn (J.S.)

**Table S1.** PFASs properties and m/z values for quantification.

| Target compounds                        | Molecular formula                                   | for- | CAS number | m/z       | Retention time (min) | LOD  | Recoveries |
|-----------------------------------------|-----------------------------------------------------|------|------------|-----------|----------------------|------|------------|
| PFBA                                    | C <sub>4</sub> HF <sub>7</sub> O <sub>2</sub>       |      | 375-22-4   | 212.9792  | 2.9                  | 3.0  | 109%       |
| PFPeA                                   | C <sub>5</sub> HF <sub>9</sub> O <sub>2</sub>       |      | 2706-90-3  | 262.976   | 4.9                  | 3.0  | 106        |
| PFHxA                                   | C <sub>6</sub> HF <sub>11</sub> O <sub>2</sub>      |      | 307-24-4   | 312.97281 | 7.5                  | 25.0 | 104%       |
| PFHpA                                   | C <sub>7</sub> HF <sub>13</sub> O <sub>2</sub>      |      | 375-85-9   | 362.96962 | 9.7                  | 5.0  | 108%       |
| PFOA                                    | C <sub>8</sub> HF <sub>15</sub> O <sub>2</sub>      |      | 335-67-1   | 412.96643 | 11.4                 | 5.0  | 108%       |
| PFNA                                    | C <sub>9</sub> HF <sub>17</sub> O <sub>2</sub>      |      | 375-95-1   | 462.96323 | 12.6                 | 10.0 | 100%       |
| PFDA                                    | C <sub>10</sub> HF <sub>19</sub> O <sub>2</sub>     |      | 335-76-2   | 512.96004 | 13.6                 | 10.0 | 99%        |
| PFUnDA                                  | C <sub>11</sub> HF <sub>21</sub> O <sub>2</sub>     |      | 2058-94-8  | 562.95684 | 14.4                 | 20.0 | 109%       |
| PFDoDA                                  | C <sub>12</sub> HF <sub>23</sub> O <sub>2</sub>     |      | 307-55-1   | 612.95365 | 15.1                 | 20.0 | 100%       |
| PFTTrDA                                 | C <sub>13</sub> HF <sub>25</sub> O <sub>2</sub>     |      | 72629-94-8 | 662.95046 | 15.7                 | 25.0 | 81%        |
| PFTeDA                                  | C <sub>14</sub> HF <sub>27</sub> O <sub>2</sub>     |      | 376-06-7   | 712.94726 | 16.2                 | 20.0 | 104%       |
| PFHxDA                                  | C <sub>16</sub> HF <sub>31</sub> O <sub>2</sub>     |      | 67905-19-5 | 812.94088 | 17                   | 40.0 | 122%       |
| PFODA                                   | C <sub>18</sub> HF <sub>33</sub> O <sub>2</sub>     |      | 16517-11-6 | 912.93449 | 17.7                 | 70.0 | 120%       |
| PFBS                                    | C <sub>4</sub> F <sub>9</sub> O <sub>3</sub> SNa    |      | 375-73-5   | 298.94299 | 5.6                  | 4.0  | 98%        |
| PFHxS                                   | C <sub>6</sub> F <sub>13</sub> SO <sub>3</sub> Na   |      | 355-46-4   | 398.9366  | 10                   | 4.0  | 102%       |
| PFOS                                    | C <sub>8</sub> F <sub>17</sub> SO <sub>3</sub> Na   |      | 1763-23-1  | 498.93022 | 12.6                 | 1.0  | 100%       |
| PFDS                                    | C <sub>10</sub> F <sub>21</sub> SO <sub>3</sub> Na  |      | 335-77-3   | 598.92383 | 14.3                 | 10.0 | 100%       |
| 6:2 Cl-PFESA                            | C <sub>8</sub> F <sub>16</sub> ClSO <sub>4</sub> K  |      | 73606-19-6 | 530.8945  | 13                   | 8.0  | 84%        |
| 8:2 Cl-PFESA                            | C <sub>10</sub> F <sub>20</sub> ClSO <sub>4</sub> K |      | 83329-89-9 | 630.8881  | 14.5                 | 11.0 | 85%        |
| [ <sup>13</sup> C <sub>2</sub> ]-PFHxA  | [ <sup>13</sup> C <sub>2</sub> ]-PFHxA              | /    |            | 314.9795  | 7.61                 |      |            |
| [ <sup>13</sup> C <sub>2</sub> ]-PFOA   | [ <sup>13</sup> C <sub>4</sub> ]-PFOA               | /    |            | 416.9798  | 11.52                |      |            |
| [ <sup>13</sup> C <sub>5</sub> ]-PFNA   | [ <sup>13</sup> C <sub>5</sub> ]-PFNA               | /    |            | 467.98    | 12.7                 |      |            |
| [ <sup>13</sup> C <sub>2</sub> ]-PFDA   | [ <sup>13</sup> C <sub>2</sub> ]-PFDA               | /    |            | 514.9667  | 13.69                |      |            |
| [ <sup>13</sup> C <sub>2</sub> ]-PFUnDA | [ <sup>13</sup> C <sub>2</sub> ]-PFUnDA             | /    |            | 564.9635  | 14.51                |      |            |
| [ <sup>13</sup> C <sub>2</sub> ]-PFDoDA | [ <sup>13</sup> C <sub>2</sub> ]-PFDoDA             | /    |            | 614.9603  | 15.18                |      |            |
| [ <sup>18</sup> O <sub>2</sub> ]-PFHxS  | [ <sup>13</sup> O <sub>2</sub> ]-PFHxS              | /    |            | 402.945   | 10.15                |      |            |
| [ <sup>13</sup> C <sub>4</sub> ]-PFOS   | [ <sup>13</sup> C <sub>4</sub> ]-PFOS               | /    |            | 502.9436  | 12.74                |      |            |

**Table S2.** The collected acute toxicity of PFASs to four species for the QSAR models.

| Species                                                  | N<br>o. | CAS No.     | PFASs                                           | EC <sub>50</sub> /LC <sub>50</sub><br>(mg/L) | References |
|----------------------------------------------------------|---------|-------------|-------------------------------------------------|----------------------------------------------|------------|
| <i>Pseudo-<br/>kirchneri-<br/>ella subcap-<br/>itata</i> | 1       | 335-67-1    | Perfluorooctanoic acid                          | 246                                          | [1-3]      |
|                                                          | 2       | 2923-18-4   | Sodium trifluoroacetate                         | 13.7                                         | [4]        |
|                                                          | 3       | 914637-49-3 | 2H,2H,3H,3H-Perfluorooctanoic acid              | 22.5                                         | [5]        |
|                                                          | 4       | 2706-90-3   | Perfluoropentanoic acid                         | 90.0                                         | [5]        |
|                                                          | 5       | 375-22-4    | Perfluorobutanoic acid                          | 262                                          | [1]        |
|                                                          | 6       | 375-95-1    | Perfluorononanoic acid                          | 482                                          | [1]        |
|                                                          | 7       | 335-76-2    | Perfluorodecanoic acid                          | 10.6                                         | [5]        |
|                                                          | 8       | 2795-39-3   | Potassium perfluorooctanesulfonate              | 139                                          | [6]        |
|                                                          | 9       | 27854-31-5  | 2-Perfluorooctyl ethanoic acid                  | 5.00                                         | [5]        |
|                                                          | 10      | 53826-12-3  | 2-Perfluorohexyl ethanoic acid                  | 47.9                                         | [5]        |
|                                                          | 11      | 812-70-4    | 3-Perfluoroheptylpropanoic acid                 | 2.10                                         | [5]        |
|                                                          | 12      | 70887-84-2  | 2H-Perfluoro-2-decenoic acid                    | 7.50                                         | [5]        |
|                                                          | 13      | 355-80-6    | 1H,1H,5H-Perfluoropentanol                      | 1130                                         | [1]        |
|                                                          | 14      | 70887-88-6  | 2H-Perfluoro-2-octenoic acid                    | 28.5                                         | [5]        |
| <i>Chlorella<br/>vulgaris</i>                            | 1       | 335-67-1    | Perfluorooctanoic acid                          | 977                                          | [7]        |
|                                                          | 2       | 307-24-4    | Perfluorohexanoic acid                          | 4030                                         | [7]        |
|                                                          | 3       | 375-95-1    | Perfluorononanoic acid                          | 497                                          | [7]        |
|                                                          | 4       | 2795-39-3   | Potassium perfluorooctanesulfonate              | 84.8                                         | [8]        |
|                                                          | 5       | 375-85-9    | Perfluoroheptanoic acid                         | 1900                                         | [7]        |
|                                                          | 6       | 27854-31-5  | 2-Perfluorooctyl ethanoic acid                  | 5.90                                         | [9]        |
|                                                          | 7       | 53826-12-3  | 2-Perfluorohexyl ethanoic acid                  | 26.2                                         | [9]        |
|                                                          | 8       | 70887-88-6  | 2H-Perfluoro-2-octenoic acid                    | 31.8                                         | [9]        |
|                                                          | 9       | 53826-13-4  | 2-Perfluorodecyl ethanoic acid                  | 4.20                                         | [9]        |
|                                                          | 10      | 70887-94-4  | 2H-Perfluoro-2-dodecenoic acid                  | 3.90                                         | [9]        |
| <i>Daphnia<br/>magna</i>                                 | 1       | 335-67-1    | Perfluorooctanoic acid                          | 202                                          | [10]       |
|                                                          | 2       | 335-24-0    | Potassium perfluoro-p-ethylcyclohexanesulfonate | 187                                          | [11]       |
|                                                          | 3       | 375-95-1    | Perfluorononanoic acid                          | 80.9                                         | [12]       |
|                                                          | 4       | 2795-39-3   | Potassium perfluorooctanesulfonate              | 78.1                                         | [10]       |
|                                                          | 5       | 45298-90-6  | Perfluorooctanesulfonate                        | 49.3                                         | [12]       |
|                                                          | 6       | 335-76-2    | Perfluorodecanoic acid                          | 2.58×10 <sup>5</sup>                         | [13]       |
|                                                          | 7       | 27854-31-5  | 2-Perfluorooctyl ethanoic acid                  | 3.52                                         | [14]       |
|                                                          | 8       | 70887-84-2  | 2H-Perfluoro-2-decenoic acid                    | 8.45                                         | [14]       |

|                    |    |            |                                                                 |      |            |
|--------------------|----|------------|-----------------------------------------------------------------|------|------------|
| <i>Danio rerio</i> | 9  | 53826-13-4 | 2-Perfluorodecyl ethanoic acid                                  | 0.06 | [14]       |
|                    | 10 | 70887-94-4 | 2H-Perfluoro-2-dodecenoic acid                                  | 0.35 | [14,15]    |
|                    | 1  | 307-24-4   | Perfluorohexanoic acid                                          | 91.1 | [16]       |
|                    | 2  | 335-67-1   | Perfluorooctanoic acid                                          | 210  | [17-21]    |
|                    | 3  | 375-95-1   | Perfluorononanoic acid                                          | 128  | [17-19]    |
|                    | 4  | 335-76-2   | Perfluorodecanoic acid                                          | 8.40 | [21]       |
|                    | 5  | 375-73-5   | Perfluorobutanesulfonic acid                                    | 1500 | [21]       |
|                    | 6  | 355-46-4   | Perfluorohexanesulfonic acid                                    | 136  | [16]       |
|                    | 7  | 1763-23-1  | Perfluorooctanesulfonic acid                                    | 64.2 | [18,22-24] |
|                    | 8  | 2795-39-3  | Potassium perfluorooctanesulfonate                              | 21.8 | [25-28]    |
|                    | 9  | 30381-98-7 | Ammonium bis(N-ethyl-2-perfluorooctylsulfonaminoethyl)phosphate | 211  | [18]       |
|                    | 10 | 73606-19-6 | Potassium 9-chlorohexadecafluoro-3-oxanonane-1-sulfonate        | 13.8 | [29]       |
|                    | 11 | 647-42-7   | 6:2 Fluorotelomer alcohol                                       | 302  | [16]       |
|                    | 12 | 34455-29-3 | 6:2 Fluorotelomer sulfonamide betaine                           | 57.4 | [29]       |

**Table S3.** The collected acute toxicity of PFASs for the ICE models.

| PFASs | No. | Species                         | LC <sub>50</sub> /EC <sub>50</sub> (mg/L) | References |
|-------|-----|---------------------------------|-------------------------------------------|------------|
| PFOA  | 1   | <i>Carassius auratus</i>        | 607                                       | [10]       |
|       | 2   | <i>Pseudorasbora parva</i>      | 365                                       | [10]       |
|       | 3   | <i>Limnodrilus hoffmeisteri</i> | 568                                       | [10]       |
| PFOS  | 1   | <i>Myriophyllum spicatum</i>    | 12.5                                      | [30]       |
| PFBS  | 1   | <i>Lepomis macrochirus</i>      | 6450                                      | [31]       |

**Table S4.** The ICE models used in this study [32].

| No. | Surrogate species          | Predicted species                       | ICE models        | Application |
|-----|----------------------------|-----------------------------------------|-------------------|-------------|
| 1   | <i>Chlorella vulgaris</i>  | <i>Scenedesmus obliquus</i>             | $y=1.00x+0.0644$  | Six PFASs   |
| 2   | <i>Daphnia magna</i>       | <i>Ceriodaphnia dubia</i>               | $y=1.02x-0.186$   | Six PFASs   |
| 3   | <i>Daphnia magna</i>       | <i>Chironomus plumosus</i>              | $y=0.743x+0.808$  | Six PFASs   |
| 4   | <i>Daphnia magna</i>       | <i>Daphnia pulex</i>                    | $y=0.994x-0.124$  | Six PFASs   |
| 5   | <i>Daphnia magna</i>       | <i>Eriocheir sinensis</i>               | $y=0.676x+2.06$   | Six PFASs   |
| 6   | <i>Daphnia magna</i>       | <i>Gammarus lacustris</i>               | $y=0.697x+0.458$  | Six PFASs   |
| 7   | <i>Daphnia magna</i>       | <i>Gammarus pulex</i>                   | $y=1.01x-0.278$   | Six PFASs   |
| 8   | <i>Daphnia magna</i>       | <i>Lymnaea stagnalis</i>                | $y=1.01x-0.0066$  | Six PFASs   |
| 9   | <i>Daphnia magna</i>       | <i>Macrobrachium nipponense</i>         | $y=0.816x-0.24$   | Six PFASs   |
| 10  | <i>Daphnia magna</i>       | <i>Macrobrachium rosenbergii</i>        | $y=0.990x-0.261$  | Six PFASs   |
| 11  | <i>Daphnia magna</i>       | <i>Paratanytarsus dissimilis</i>        | $y=0.572x+2.17$   | Six PFASs   |
| 12  | <i>Daphnia magna</i>       | <i>Paratanytarsus parthenogeneticus</i> | $y=0.938x+0.743$  | Six PFASs   |
| 13  | <i>Daphnia magna</i>       | <i>Physa gyrina</i>                     | $y=0.991x-0.021$  | Six PFASs   |
| 14  | <i>Carassius auratus</i>   | <i>Ctenopharyngodon idellus</i>         | $y=0.798x+0.705$  | PFOA        |
| 15  | <i>Carassius auratus</i>   | <i>Euphyctis hexadactylus</i>           | $y=1.15x-0.775$   | PFOA        |
| 16  | <i>Carassius auratus</i>   | <i>Gobiocypris rarus</i>                | $y=0.893x+0.293$  | PFOA        |
| 17  | <i>Carassius auratus</i>   | <i>Hypophthalmichthys molitrix</i>      | $y=0.977x-0.026$  | PFOA        |
| 18  | <i>Carassius auratus</i>   | <i>Ictalurus punctatus</i>              | $y=0.907x+0.268$  | PFOA        |
| 19  | <i>Carassius auratus</i>   | <i>Lepomis cyanellus</i>                | $y=0.850x+0.0071$ | PFOA        |
| 21  | <i>Carassius auratus</i>   | <i>Lepomis macrochirus</i>              | $y=0.957x-0.267$  | PFOA        |
| 22  | <i>Carassius auratus</i>   | <i>Micropterus salmoides</i>            | $y=0.869x-0.465$  | PFOA        |
| 23  | <i>Carassius auratus</i>   | <i>Misgurnus anguillicaudatus</i>       | $y=0.950x+1.41$   | PFOA        |
| 24  | <i>Carassius auratus</i>   | <i>Monopterus albus</i>                 | $y=0.792x+0.84$   | PFOA        |
| 25  | <i>Carassius auratus</i>   | <i>Oncorhynchus mykiss</i>              | $y=1.01x-0.594$   | PFOA        |
| 26  | <i>Carassius auratus</i>   | <i>Pelteobagrus fulvidraco</i>          | $y=0.439x+1.29$   | PFOA        |
| 27  | <i>Carassius auratus</i>   | <i>Poecilia reticulata</i>              | $y=0.735x+0.372$  | PFOA        |
| 28  | <i>Carassius auratus</i>   | <i>Pseudorasbora parva</i>              | $y=1.03x-0.0976$  | PFOA        |
| 29  | <i>Carassius auratus</i>   | <i>Rana limnocharis</i>                 | $y=0.581x+1.33$   | PFOA        |
| 30  | <i>Pseudorasbora parva</i> | <i>Carassius auratus</i>                | $y=0.784x+0.797$  | PFOA        |

|    |                             |        |                               |                   |      |
|----|-----------------------------|--------|-------------------------------|-------------------|------|
| 31 | <i>Pseudorasbora parva</i>  |        | <i>Cyprinus carpio</i>        | $y=0.981x-0.517$  | PFOA |
| 32 | <i>Limnodrilus meisteri</i> | hoff-  | <i>Branchiura sowerbyi</i>    | $y=0.841x+0.393$  | PFOA |
| 33 | <i>Limnodrilus meisteri</i> | hoff-  | <i>Lumbriculus variegatus</i> | $y=0.980x-0.404$  | PFOA |
| 34 | <i>Limnodrilus meisteri</i> | hoff-  | <i>Tubifex tubifex</i>        | $y=1.05x-0.256$   | PFOA |
| 35 | <i>Lepomis chirus</i>       | macro- | <i>Carassius auratus</i>      | $y=0.752x+1.13$   | PFBS |
| 36 | <i>Lepomis chirus</i>       | macro- | <i>Ictalurus punctatus</i>    | $y=0.788x+0.862$  | PFBS |
| 37 | <i>Lepomis chirus</i>       | macro- | <i>Oncorhynchus mykiss</i>    | $y=0.943x+0.0589$ | PFBS |
| 38 | <i>Lepomis chirus</i>       | macro- | <i>Poecilia reticulata</i>    | $y=0.748x+0.976$  | PFBS |
| 39 | <i>Myriophyllum catum</i>   | spi-   | <i>Ceratophyllum demersum</i> | $y=0.941x-0.235$  | PFOS |

**Table S5.** The predicted acute toxicity of PFASs by QSAR-ICE models.

| PFASs | No. | Species                                 | LC <sub>50</sub> /EC <sub>50</sub> (mg/L) |
|-------|-----|-----------------------------------------|-------------------------------------------|
| PFBA  | 1   | <i>Ceriodaphnia dubia</i>               | 29.84                                     |
|       | 2   | <i>Chironomus plumosus</i>              | 15.96                                     |
|       | 3   | <i>Daphnia pulex</i>                    | 26.24                                     |
|       | 4   | <i>Eriocheir sinensis</i>               | 140.31                                    |
|       | 5   | <i>Gammarus lacustris</i>               | 4.41                                      |
|       | 6   | <i>Gammarus pulex</i>                   | 22.24                                     |
|       | 7   | <i>Lymnaea stagnalis</i>                | 107.97                                    |
|       | 8   | <i>Macrobrachium nipponense</i>         | 41.81                                     |
|       | 9   | <i>Macrobrachium rosenbergii</i>        | 3.11                                      |
|       | 10  | <i>Paratanytarsus dissimilis</i>        | 18.42                                     |
|       | 11  | <i>Paratanytarsus parthenogeneticus</i> | 61.18                                     |
|       | 12  | <i>Physa gyrina</i>                     | 32.46                                     |
|       | 13  | <i>Scenedesmus obliquus</i>             | 133.66                                    |
| PFOA  | 1   | <i>Branchiura sowerbyi</i>              | 170.89                                    |
|       | 2   | <i>Carassius auratus</i>                | 143.01                                    |
|       | 3   | <i>Ceriodaphnia dubia</i>               | 479.64                                    |
|       | 4   | <i>Chironomus plumosus</i>              | 120.64                                    |
|       | 5   | <i>Ctenopharyngodon idellus</i>         | 207.75                                    |
|       | 6   | <i>Cyprinus carpio</i>                  | 87.00                                     |
|       | 7   | <i>Daphnia pulex</i>                    | 393.01                                    |
|       | 8   | <i>Eriocheir sinensis</i>               | 884.26                                    |
|       | 9   | <i>Euphyctis hexadactylus</i>           | 702.60                                    |
|       | 10  | <i>Gammarus lacustris</i>               | 29.47                                     |

---

|      |    |                                         |         |
|------|----|-----------------------------------------|---------|
|      | 11 | <i>Gammarus pulex</i>                   | 349.76  |
|      | 12 | <i>Gobiocypris rarus</i>                | 287.02  |
|      | 13 | <i>Hypophthalmichthys molitrix</i>      | 420.63  |
|      | 14 | <i>Ictalurus punctatus</i>              | 324.76  |
|      | 15 | <i>Lepomis cyanellus</i>                | 83.67   |
|      | 16 | <i>Lepomis macrochirus</i>              | 186.19  |
|      | 17 | <i>Lumbriculus variegatus</i>           | 170.93  |
|      | 18 | <i>Lymnaea stagnalis</i>                | 658.72  |
|      | 19 | <i>Macrobrachium nipponense</i>         | 28.79   |
|      | 20 | <i>Macrobrachium rosenbergii</i>        | 273.04  |
|      | 21 | <i>Micropterus salmoides</i>            | 36.11   |
|      | 22 | <i>Misgurnus anguillicaudatus</i>       | 294.39  |
|      | 23 | <i>Monopterus albus</i>                 | 262.41  |
|      | 24 | <i>Oncorhynchus mykiss</i>              | 172.89  |
|      | 25 | <i>Paratanytarsus dissimilis</i>        | 290.37  |
|      | 26 | <i>Paratanytarsus parthenogeneticus</i> | 1391.20 |
|      | 27 | <i>Pelteobagrus fulvidraco</i>          | 6.74    |
|      | 28 | <i>Physa gyrina</i>                     | 483.05  |
|      | 29 | <i>Poecilia reticulata</i>              | 95.70   |
|      | 30 | <i>Pseudorasbora parva</i>              | 1748.47 |
|      | 31 | <i>Rana limnocharis</i>                 | 48.71   |
|      | 32 | <i>Scenedesmus obliquus</i>             | 178.68  |
|      | 33 | <i>Selenastrum bibraianum</i>           | 477.50  |
|      | 34 | <i>Tubifex tubifex</i>                  | 593.94  |
|      | 1  | <i>Carassius auratus</i>                | 1776.50 |
|      | 2  | <i>Ceriodaphnia dubia</i>               | 408.24  |
|      | 3  | <i>Chironomus plumosus</i>              | 107.28  |
|      | 4  | <i>Daphnia pulex</i>                    | 335.87  |
|      | 5  | <i>Eriocheir sinensis</i>               | 794.64  |
| PFBS | 6  | <i>Gammarus lacustris</i>               | 26.40   |
|      | 7  | <i>Gammarus pulex</i>                   | 298.07  |
|      | 8  | <i>Ictalurus punctatus</i>              | 1686.46 |
|      | 9  | <i>Lymnaea stagnalis</i>                | 561.30  |
|      | 10 | <i>Macrobrachium nipponense</i>         | 25.31   |
|      | 11 | <i>Macrobrachium rosenbergii</i>        | 233.49  |

---

|       |     |    |                                         |         |
|-------|-----|----|-----------------------------------------|---------|
|       |     | 12 | <i>Oncorhynchus mykiss</i>              | 3018.29 |
|       |     | 13 | <i>Paratanytarsus dissimilis</i>        | 265.28  |
|       |     | 14 | <i>Paratanytarsus parthenogeneticus</i> | 1199.37 |
|       |     | 15 | <i>Physa gyrina</i>                     | 412.97  |
|       |     | 16 | <i>Poecilia reticulata</i>              | 1172.93 |
|       |     | 17 | <i>Scenedesmus obliquus</i>             | 264.06  |
|       |     | 1  | <i>Ceriodaphnia dubia</i>               | 694.99  |
|       |     | 2  | <i>Chironomus plumosus</i>              | 158.06  |
|       |     | 3  | <i>Daphnia pulex</i>                    | 564.14  |
|       |     | 4  | <i>Eriocheir sinensis</i>               | 1130.70 |
|       |     | 5  | <i>Gammarus lacustris</i>               | 37.98   |
|       |     | 6  | <i>Gammarus pulex</i>                   | 505.32  |
| PFHxS |     | 7  | <i>Lymnaea stagnalis</i>                | 951.93  |
|       |     | 8  | <i>Macrobrachium nipponense</i>         | 38.75   |
|       |     | 9  | <i>Macrobrachium rosenbergii</i>        | 391.40  |
|       |     | 10 | <i>Paratanytarsus dissimilis</i>        | 357.50  |
|       |     | 11 | <i>Paratanytarsus parthenogeneticus</i> | 1957.19 |
|       |     | 12 | <i>Physa gyrina</i>                     | 692.78  |
|       |     | 13 | <i>Scenedesmus obliquus</i>             | 307.10  |
|       |     | 1  | <i>Ceratophyllum demersum</i>           | 4.17    |
|       |     | 2  | <i>Ceriodaphnia dubia</i>               | 142.28  |
|       |     | 3  | <i>Chironomus plumosus</i>              | 49.78   |
|       |     | 4  | <i>Daphnia pulex</i>                    | 120.22  |
|       |     | 5  | <i>Eriocheir sinensis</i>               | 395.10  |
|       |     | 6  | <i>Gammarus lacustris</i>               | 12.84   |
| PFOS  |     | 7  | <i>Gammarus pulex</i>                   | 104.74  |
|       |     | 8  | <i>Lymnaea stagnalis</i>                | 197.10  |
|       |     | 9  | <i>Macrobrachium nipponense</i>         | 10.88   |
|       |     | 10 | <i>Macrobrachium rosenbergii</i>        | 83.90   |
|       |     | 11 | <i>Paratanytarsus dissimilis</i>        | 146.89  |
|       |     | 12 | <i>Paratanytarsus parthenogeneticus</i> | 454.56  |
|       |     | 13 | <i>Physa gyrina</i>                     | 148.19  |
|       |     | 14 | <i>Scenedesmus obliquus</i>             | 367.93  |
| 6:2   | Cl- | 1  | <i>Ceriodaphnia dubia</i>               | 8.52    |
| PFESA |     | 2  | <i>Chironomus plumosus</i>              | 6.40    |



|    |                                         |        |
|----|-----------------------------------------|--------|
| 3  | <i>Daphnia pulex</i>                    | 7.73   |
| 4  | <i>Eriocheir sinensis</i>               | 61.12  |
| 5  | <i>Gammarus lacustris</i>               | 1.87   |
| 6  | <i>Gammarus pulex</i>                   | 6.41   |
| 7  | <i>Lymnaea stagnalis</i>                | 12.04  |
| 8  | <i>Macrobrachium nipponense</i>         | 1.14   |
| 9  | <i>Macrobrachium rosenbergii</i>        | 5.45   |
| 10 | <i>Paratanytarsus dissimilis</i>        | 30.29  |
| 11 | <i>Paratanytarsus parthenogeneticus</i> | 34.06  |
| 12 | <i>Physa gyrina</i>                     | 9.59   |
| 13 | <i>Scenedesmus obliquus</i>             | 100.82 |

**Table S6.** The results of the goodness-of-fit tests of SSD models.

| SSD models                        | A-D Test | K-S Test | C-M Test |
|-----------------------------------|----------|----------|----------|
| Threshold value ( $\alpha=0.01$ ) | 1.04     | 1.04     | 0.179    |
| PFBA                              | 0.399    | 0.599    | 0.048    |
| PFOA (QSAR-ICE data)              | 0.442    | 0.652    | 0.067    |
| PFOA (Measured data)              | 0.599    | 0.630    | 0.078    |
| PFBS                              | 0.443    | 0.739    | 0.050    |
| PFHxS                             | 0.634    | 0.715    | 0.079    |
| PFOS (QSAR-ICE data)              | 0.674    | 0.673    | 0.102    |
| PFOS (Measured data)              | 0.349    | 0.513    | 0.048    |
| 6:2 Cl-PFESA                      | 0.355    | 0.611    | 0.050    |

**Table S7.** The measured acute toxicity of PFOA and PFOS.

| PFASs | No. | Species                          | LC <sub>50</sub> /EC <sub>50</sub> (μg/L) | References |
|-------|-----|----------------------------------|-------------------------------------------|------------|
| PFOA  | 1   | <i>Anabaena sp.</i>              | 3.95×10 <sup>4</sup>                      | [33,34]    |
|       | 2   | <i>Scenedesmus acutus</i>        | 4.40×10 <sup>4</sup>                      | [35]       |
|       | 3   | <i>Chlamydomonas reinhardtii</i> | 5.19×10 <sup>4</sup>                      | [35]       |
|       | 4   | <i>Chlorella pyrenoidosa</i>     | 1.91×10 <sup>5</sup>                      | [3]        |
|       | 5   | <i>Scenedesmus quadricauda</i>   | 2.70×10 <sup>5</sup>                      | [10]       |

|      |    |                                    |                    |         |
|------|----|------------------------------------|--------------------|---------|
|      | 6  | <i>Skeletonema marinoi</i>         | $3.69 \times 10^5$ | [7]     |
|      | 7  | <i>Brachionus calyciflorus</i>     | $1.50 \times 10^5$ | [36]    |
|      | 8  | <i>Bufo gargarizans</i>            | $1.15 \times 10^5$ | [10]    |
|      | 9  | <i>Carassius auratus</i>           | $6.07 \times 10^5$ | [10]    |
|      | 10 | <i>Pimephales promelas</i>         | $4.13 \times 10^5$ | [20]    |
|      | 11 | <i>Pseudorasbora parva</i>         | $3.65 \times 10^5$ | [10]    |
|      | 12 | <i>Chironomus plumosus</i>         | $4.02 \times 10^5$ | [10]    |
|      | 13 | <i>Daphnia magna</i>               | $7.37 \times 10^6$ | [10,13] |
|      | 14 | <i>Macrobrachium nipponense</i>    | $3.67 \times 10^5$ | [10]    |
|      | 15 | <i>Cipangopaludina cathayensis</i> | $7.40 \times 10^5$ | [10]    |
|      | 16 | <i>Dugesia japonica</i>            | $4.21 \times 10^4$ | [37]    |
|      | 17 | <i>Limnodrilus hoffmeisteri</i>    | $5.68 \times 10^5$ | [10]    |
|      | 1  | <i>Isochrysis galbana</i>          | $3.75 \times 10^4$ | [38]    |
|      | 2  | <i>Anabaena sp.</i>                | $1.63 \times 10^4$ | [34]    |
|      | 3  | <i>Dugesia japonica</i>            | $2.56 \times 10^4$ | [39]    |
|      | 4  | <i>Ligumia recta</i>               | $1.42 \times 10^5$ | [40]    |
|      | 5  | <i>Lampsilis siliquoidea</i>       | $1.58 \times 10^5$ | [40]    |
|      | 6  | <i>Pelophylax nigromaculatus</i>   | $9.50 \times 10^4$ | [41]    |
|      | 7  | <i>Xenopus laevis</i>              | $5.15 \times 10^4$ | [42]    |
|      | 8  | <i>Perna viridis</i>               | $6.83 \times 10^4$ | [43]    |
|      | 9  | <i>Pagrus major</i>                | $2.26 \times 10^4$ | [44]    |
| PFOS | 10 | <i>Navicula pelliculosa</i>        | $2.63 \times 10^5$ | [30]    |
|      | 11 | <i>Lemna gibba</i>                 | $5.91 \times 10^4$ | [30]    |
|      | 12 | <i>Daphnia pulex</i>               | $1.34 \times 10^5$ | [30]    |
|      | 13 | <i>Anabaena flos-aquae</i>         | $1.31 \times 10^5$ | [30]    |
|      | 14 | <i>Lemna gibba</i>                 | $1.08 \times 10^5$ | [30]    |
|      | 15 | <i>Myriophyllum spicatum</i>       | $1.25 \times 10^4$ | [30]    |
|      | 16 | <i>Unio complanatus</i>            | $5.70 \times 10^4$ | [30]    |
|      | 17 | <i>Artemia salina</i>              | $9.40 \times 10^3$ | [30]    |
|      | 18 | <i>Rainbow trout</i>               | $2.20 \times 10^4$ | [30]    |
|      | 19 | <i>Pimephales promelas</i>         | $9.10 \times 10^3$ | [30]    |

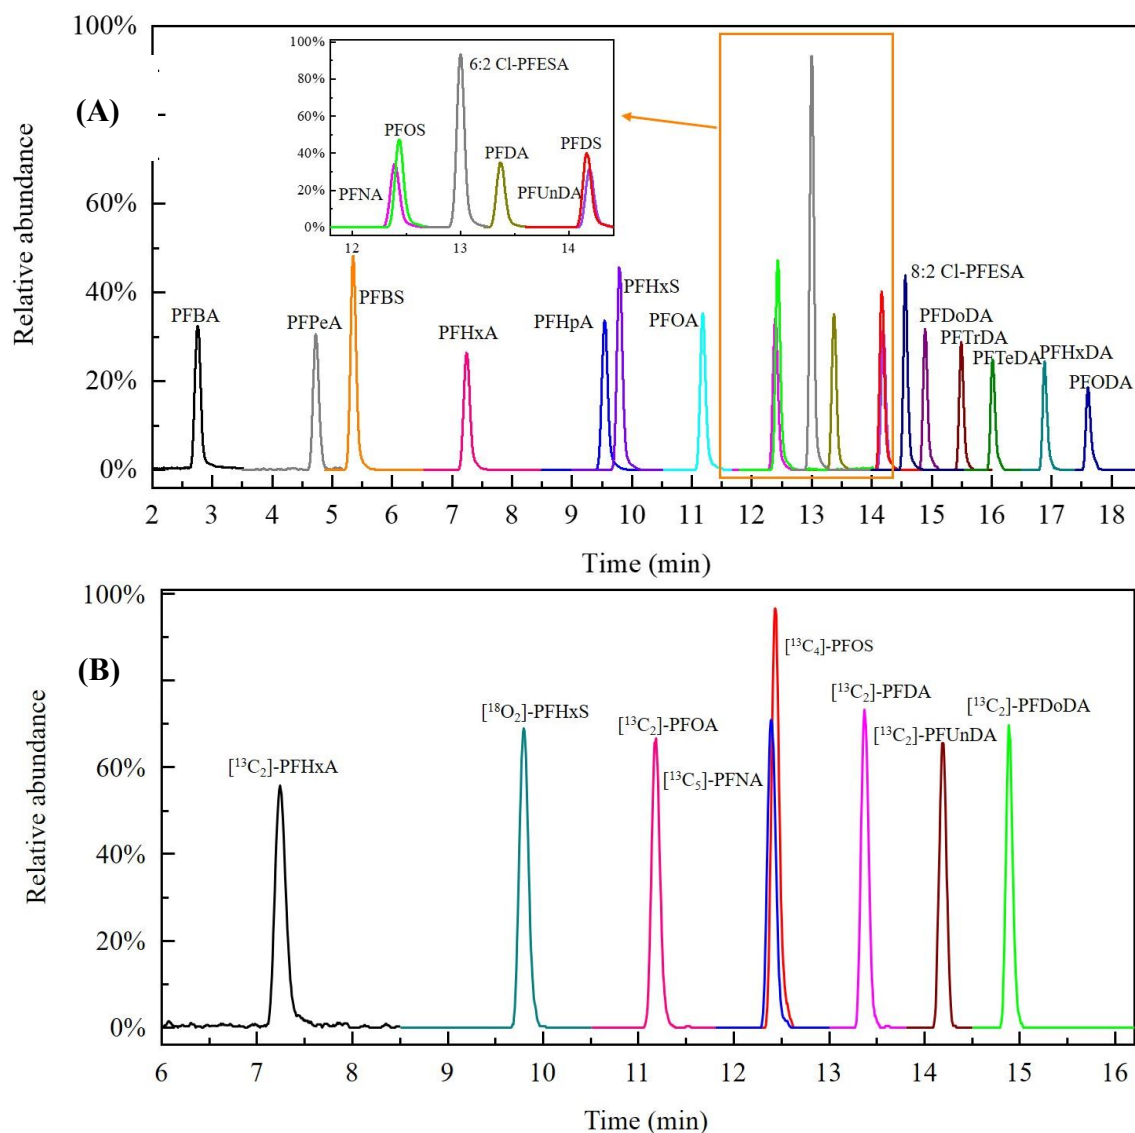

**Figure S1.** Liquid chromatography coupled to hybrid quadrupole-Orbitrap mass spectrometer LC-MS (Q-Exactive) (Thermo fisher scientific, USA) chromatograms for (A) standard PFASs and their (B) internal standard.

---

## References:

1. Ding, G.; Wouterse, M.; Baerselman, R.; Peijnenburg, W.J.G.M. Toxicity of Polyfluorinated and Perfluorinated Compounds to Lettuce (*Lactuca sativa*) and Green Algae (*Pseudokirchneriella subcapitata*). *Archives of Environmental Contamination and Toxicology* **2012**, *62*, 49-55, doi:10.1007/s00244-011-9684-9.
2. Rosal, R.; Rodea-Palomares, I.; Boltes, K.; Fernández-Piñas, F.; Leganés, F.; Petre, A. Ecotoxicological assessment of surfactants in the aquatic environment: Combined toxicity of docusate sodium with chlorinated pollutants. *Chemosphere* **2010**, *81*, 288-293, doi:https://doi.org/10.1016/j.chemosphere.2010.05.050.
3. Xu, D.; Li, C.; Chen, H.; Shao, B. Cellular response of freshwater green algae to perfluorooctanoic acid toxicity. *Ecotoxicology and Environmental Safety* **2013**, *88*, 103-107, doi:https://doi.org/10.1016/j.ecoenv.2012.10.027.
4. USEPA. Comparison of the Toxicity of Sodium Trifluoroacetate, Difluoroacetic Acid, Sodium Monofluoroacetate and Sodium Fluoride to the Alga. **1995**.
5. Hoke, R.A.; Bouchelle, L.D.; Ferrell, B.D.; Buck, R.C. Comparative acute freshwater hazard assessment and preliminary PNEC development for eight fluorinated acids. *Chemosphere* **2012**, *87*, 725-733, doi:https://doi.org/10.1016/j.chemosphere.2011.12.066.
6. Beach, S.A.; Newsted, J.L.; Coady, K.; Giesy, J.P. Ecotoxicological Evaluation of Perfluorooctanesulfonate (PFOS). In *Reviews of Environmental Contamination and Toxicology: Continuation of Residue Reviews*, Albert, L.A., de Voogt, P., Gerba, C.P., Hutzinger, O., Knaak, J.B., Mayer, F.L., Morgan, D.P., Park, D.L., Tjeerdema, R.S., Whitacre, D.M., et al., Eds.; Springer New York: New York, NY, 2006; pp. 133-174.
7. Latała, A.; Nędzi, M.; Stepnowski, P. Acute toxicity assessment of perfluorinated carboxylic acids towards the Baltic microalgae. *Environ. Toxicol. Pharmacol.* **2009**, *28*, 167-171, doi:https://doi.org/10.1016/j.etap.2009.03.010.
8. Boudreau, T.M.; Sibley, P.K.; Mabury, S.A.; Muir, D.G.C.; Solomon, K.R. Laboratory Evaluation of the Toxicity of Perfluorooctane Sulfonate (PFOS) on *Selenastrum capricornutum*, *Chlorella vulgaris*, *Lemna gibba*, *Daphnia magna*, and *Daphnia pulex*. *Archives of Environmental Contamination and Toxicology* **2003**, *44*, 0307-0313, doi:10.1007/s00244-002-2102-6.
9. Mitchell, R.J.; Myers, A.L.; Mabury, S.A.; Solomon, K.R.; Sibley, P.K. Toxicity of fluorotelomer carboxylic acids to the algae *Pseudokirchneriella subcapitata* and *Chlorella vulgaris*, and the amphipod *Hyalella azteca*. *Ecotoxicology and Environmental Safety* **2011**, *74*, 2260-2267, doi:https://doi.org/10.1016/j.ecoenv.2011.07.034.
10. Yang, S.; Xu, F.; Wu, F.; Wang, S.; Zheng, B. Development of PFOS and PFOA criteria for the protection of freshwater aquatic life in China. *Science of The Total Environment* **2014**, *470-471*, 677-683, doi:https://doi.org/10.1016/j.scitotenv.2013.09.094.
11. Houde, M.; Douville, M.; Giraudo, M.; Jean, K.; Lépine, M.; Spencer, C.; De Silva, A.O. Endocrine-disruption potential of perfluoroethylcyclohexane sulfonate (PFECES) in chronically exposed *Daphnia magna*. *Environmental Pollution* **2016**, *218*, 950-956, doi:https://doi.org/10.1016/j.envpol.2016.08.043.
12. Lu, G.-h.; Liu, J.-c.; Sun, L.-s.; Yuan, L.-j. Toxicity of perfluorononanoic acid and perfluorooctane sulfonate to *Daphnia magna*. *Water Science and Engineering* **2015**, *8*, 40-48, doi:https://doi.org/10.1016/j.wse.2015.01.001.
13. Boudreau, T.M. Toxicity of perfluorinated organic acids to selected freshwater organisms under laboratory and field conditions. 2002.
14. Phillips, M.M.; Dinglasan-Panlilio, M.J.A.; Mabury, S.A.; Solomon, K.R.; Sibley, P.K. Fluorotelomer Acids are More Toxic than Perfluorinated Acids. *Environmental Science & Technology* **2007**, *41*, 7159-7163, doi:10.1021/es070734c.
15. MacDonald, M.M. Fluorotelomer acid toxicity to aquatic organisms. 2006.

16. Annunziato, K.M.; Jantzen, C.E.; Gronske, M.C.; Cooper, K.R. Subtle morphometric, behavioral and gene expression effects in larval zebrafish exposed to PFHxA, PFHxS and 6:2 FTOH. *Aquatic Toxicology* **2019**, *208*, 126-137, doi:<https://doi.org/10.1016/j.aquatox.2019.01.009>.
17. Stengel, D.; Wahby, S.; Braunbeck, T. In search of a comprehensible set of endpoints for the routine monitoring of neurotoxicity in vertebrates: sensory perception and nerve transmission in zebrafish (*Danio rerio*) embryos. *Environmental Science and Pollution Research* **2018**, *25*, 4066-4084, doi:[10.1007/s11356-017-0399-y](https://doi.org/10.1007/s11356-017-0399-y).
18. Zheng, X.-M.; Liu, H.-L.; Shi, W.; Wei, S.; Giesy, J.P.; Yu, H.-X. Effects of perfluorinated compounds on development of zebrafish embryos. *Environmental Science and Pollution Research* **2012**, *19*, 2498-2505, doi:[10.1007/s11356-012-0977-y](https://doi.org/10.1007/s11356-012-0977-y).
19. Kalasekar, S.M.; Zacharia, E.; Kessler, N.; Ducharme, N.A.; Gustafsson, J.-Å.; Kakadiaris, I.A.; Bondesson, M. Identification of environmental chemicals that induce yolk malabsorption in zebrafish using automated image segmentation. *Reproductive Toxicology* **2015**, *55*, 20-29, doi:<https://doi.org/10.1016/j.reprotox.2014.10.022>.
20. Corrales, J.; Kristofco, L.A.; Steele, W.B.; Saari, G.N.; Kostal, J.; Williams, E.S.; Mills, M.; Gallagher, E.P.; Kavanagh, T.J.; Simcox, N.; et al. Toward the Design of Less Hazardous Chemicals: Exploring Comparative Oxidative Stress in Two Common Animal Models. *Chem. Res. Toxicol.* **2017**, *30*, 893-904, doi:[10.1021/acs.chemrestox.6b00246](https://doi.org/10.1021/acs.chemrestox.6b00246).
21. Ulhaq, M.; Carlsson, G.; Örn, S.; Norrgren, L. Comparison of developmental toxicity of seven perfluoroalkyl acids to zebrafish embryos. *Environ. Toxicol. Pharmacol.* **2013**, *36*, 423-426, doi:<https://doi.org/10.1016/j.etap.2013.05.004>.
22. Huang, H.; Huang, C.; Wang, L.; Ye, X.; Bai, C.; Simonich, M.T.; Tanguay, R.L.; Dong, Q. Toxicity, uptake kinetics and behavior assessment in zebrafish embryos following exposure to perfluorooctanesulphonic acid (PFOS). *Aquatic Toxicology* **2010**, *98*, 139-147, doi:<https://doi.org/10.1016/j.aquatox.2010.02.003>.
23. Stengel, D.; Zindler, F.; Braunbeck, T. An optimized method to assess ototoxic effects in the lateral line of zebrafish (*Danio rerio*) embryos. *Comparative Biochemistry and Physiology Part C: Toxicology & Pharmacology* **2017**, *193*, 18-29, doi:<https://doi.org/10.1016/j.cbpc.2016.11.001>.
24. Li, Y.; Han, Z.; Zheng, X.; Ma, Z.; Liu, H.; Giesy, J.P.; Xie, Y.; Yu, H. Comparison of waterborne and in ovo nanoinjection exposures to assess effects of PFOS on zebrafish embryos. *Environmental Science and Pollution Research* **2015**, *22*, 2303-2310, doi:[10.1007/s11356-014-3527-y](https://doi.org/10.1007/s11356-014-3527-y).
25. Wang, S.; Zhuang, C.; Du, J.; Wu, C.; You, H. The presence of MWCNTs reduces developmental toxicity of PFOS in early life stage of zebrafish. *Environmental Pollution* **2017**, *222*, 201-209, doi:<https://doi.org/10.1016/j.envpol.2016.12.055>.
26. Ding, G.; Zhang, J.; Chen, Y.; Wang, L.; Wang, M.; Xiong, D.; Sun, Y. Combined Effects of PFOS and PFOA on Zebrafish (*Danio rerio*) Embryos. *Archives of Environmental Contamination and Toxicology* **2013**, *64*, 668-675, doi:[10.1007/s00244-012-9864-2](https://doi.org/10.1007/s00244-012-9864-2).
27. Hagenaaars, A.; Stinckens, E.; Vergauwen, L.; Bervoets, L.; Knapen, D. PFOS affects posterior swim bladder chamber inflation and swimming performance of zebrafish larvae. *Aquatic Toxicology* **2014**, *157*, 225-235, doi:<https://doi.org/10.1016/j.aquatox.2014.10.017>.
28. Hagenaaars, A.; Vergauwen, L.; De Coen, W.; Knapen, D. Structure–activity relationship assessment of four perfluorinated chemicals using a prolonged zebrafish early life stage test. *Chemosphere* **2011**, *82*, 764-772, doi:<https://doi.org/10.1016/j.chemosphere.2010.10.076>.
29. Shi, G.; Cui, Q.; Pan, Y.; Sheng, N.; Sun, S.; Guo, Y.; Dai, J. 6:2 Chlorinated polyfluorinated ether sulfonate, a PFOS alternative, induces embryotoxicity and disrupts cardiac development in zebrafish embryos. *Aquatic Toxicology* **2017**, *185*, 67-75, doi:<https://doi.org/10.1016/j.aquatox.2017.02.002>.
30. Cao, Y.; Zhang, Y.; Lei, C.; Liu, Z. Environmental Pollution and Ecological Toxicity of Perfluorinated Chemicals: A Review. *Journal of Environment and Health* **2012**, *29*, 561-567.
31. Australian Department of Health and Ageing (DoHA). Potassium Perfluorobutane Sulfonate, Existing Chemical Hazard Assessment. **2005**.

32. Wang, X.; Fan, B.; Fan, M.; Belanger, S.; Li, J.; Chen, J.; Gao, X.; Liu, Z. Development and use of interspecies correlation estimation models in China for potential application in water quality criteria. *Chemosphere* **2020**, *240*, doi:10.1016/j.chemosphere.2019.124848.
33. Rodea-Palomares, I.; Makowski, M.; Gonzalo, S.; González-Pleiter, M.; Leganés, F.; Fernández-Piñas, F. Effect of PFOA/PFOS pre-exposure on the toxicity of the herbicides 2,4-D, Atrazine, Diuron and Paraquat to a model aquatic photosynthetic microorganism. *Chemosphere* **2015**, *139*, 65-72, doi:https://doi.org/10.1016/j.chemosphere.2015.05.078.
34. Rodea-Palomares, I.; Leganés, F.; Rosal, R.; Fernández-Piñas, F. Toxicological interactions of perfluorooctane sulfonic acid (PFOS) and perfluorooctanoic acid (PFOA) with selected pollutants. *Journal of Hazardous Materials* **2012**, *201-202*, 209-218, doi:https://doi.org/10.1016/j.jhazmat.2011.11.061.
35. Hu, C.; Luo, Q.; Huang, Q. Ecotoxicological effects of perfluorooctanoic acid on freshwater microalgae *Chlamydomonas reinhardtii* and *Scenedesmus obliquus*. *Environmental Toxicology and Chemistry* **2014**, *33*, 1129-1134, doi:https://doi.org/10.1002/etc.2532.
36. Zhang, L.; Niu, J.; Li, Y.; Wang, Y.; Sun, D. Evaluating the sub-lethal toxicity of PFOS and PFOA using rotifer *Brachionus calyciflorus*. *Environmental Pollution* **2013**, *180*, 34-40, doi:https://doi.org/10.1016/j.envpol.2013.04.031.
37. Yuan, Z.; Zhang, J.; Zhang, Y.; Zhen, H.; Sun, Y. The Effect of Perfluorooctanoic Acid on the Planarian *Dugesia japonica*. *Polish Journal of Environmental Studies* **2015**, *24*, 801-807, doi:10.15244/pjoes/32098.
38. Mhadhbi, L.; Rial, D.; Pérez, S.; Beiras, R. Ecological risk assessment of perfluorooctanoic acid (PFOA) and perfluorooctanesulfonic acid (PFOS) in marine environment using *Isochrysis galbana*, *Paracentrotus lividus*, *Siriella armata* and *Psetta maxima*. *Journal of Environmental Monitoring* **2012**, *14*, 1375-1382, doi:10.1039/C2EM30037K.
39. Li, M.-H. Effects of nonionic and ionic surfactants on survival, oxidative stress, and cholinesterase activity of planarian. *Chemosphere* **2008**, *70*, 1796-1803, doi:https://doi.org/10.1016/j.chemosphere.2007.08.032.
40. Hazelton, P.D.; Cope, W.G.; Pandolfo, T.J.; Mosher, S.; Strynar, M.J.; Barnhart, M.C.; Bringolf, R.B. Partial life-cycle and acute toxicity of perfluoroalkyl acids to freshwater mussels. *Environmental Toxicology and Chemistry* **2012**, *31*, 1611-1620, doi:https://doi.org/10.1002/etc.1866.
41. Su, H.; Ren, D.; Cao, S.; Qin, Z. Acute Toxicity of Perfluorooctane Sulfonate (PFOS) and Its Substitutes to Amphibian Tadpoles. *Asian Journal of Ecotoxicology* **2012**, *7*, 521-524.
42. Wei, R.; Su, H.; Qin, Z. Developmental Toxicity of Perfluorooctane Sulfonate, Perfluorohexane Sulfonate and Perfluorobutane Sulfonate to *Xenopus* Embryos. *Asian Journal of Ecotoxicology* **2012**, *7*, 542-548.
43. Wang, H.; Ma, S.; Zhang, Z.; Chen, H.; Huang, Z.; Gong, X.; Cai, W.; Jia, X. Effects of Perfluorooctane Sulfonate (PFOS) Exposure on Antioxidant Enzymes of *Perna viridis*. *Asian Journal of Ecotoxicology* **2012**, *7*, 508-516.
44. Wang, H. Effects of Perfluorooctanesulfonate on Antioxidant System, Tissues Injury and Genes Expression of *Perna viridis* and *Pagrosomus major*. Shanghai Ocean University, Shanghai, China, 2012.
